# Supplementary material
Source: PubMed Central journal article supplement (PMC2785323)
Supplement: supp_M109.029348_jbc.M109.029348-1.pdf [file supp_M109.029348_jbc.M109.029348-1.pdf]

Supplemental table S1 Primers used in DSB-induced gene targeting assay

| name       | Sequence                                                                          |
|------------|-----------------------------------------------------------------------------------|
| NeoS       | GGATCGGCCATTGAACAAGATGGATTGCAC                                                    |
| NeoE       | CCTCAGAAGAAGCTCGTCAAGAAGGCGATAG                                                   |
| Mneo-1 (+) | ATGCCCGACGGCGAGGATCTCGTCGTGACCAGGGATAACAGG<br>GTAATCGATGCCTGCTTGCCGAATATCATGGTGGA |
| Mneo-1 (-) | TCCACCATGATATTCGGCAAGCAGGCATCGATTACCCTGTTAT<br>CCCTGGTCACGACGAGATCCTCGCCGTCGGGCAT |
| Mneo-2 (+) | ATGCCCGACGGCGAGGATCTCGTCGTGACCAGGGTAATCGAT<br>GCCTGCTTGCCGAATATCATGGTGGA          |
| Mneo-2 (-) | TCCACCATGATATTCGGCAAGCAGGCATCGATTACCCTGGTC<br>ACGACGAGATCCTCGCCGTCGGGCAT          |
| Mneo-3 (+) | ATGCCCGACGGCGAGGATCTCGTCGTGACCGATGCCTGCTTG<br>CCGAATATCATGGTGGA                   |
| Mneo-3 (-) | TCCACCATGATATTCGGCAAGCAGGCATCGGTCACGACGAGA<br>TCCTCGCCGTCGGGCAT                   |
| Mneo-4 (+) | CTCAAGGCGCGCATGCCCGACGGCATCATGGTGGAATAATGGC<br>CGCTTTTCTGG                        |
| Mneo-4 (-) | CCAGAAAAGCGGCCATTTTCCACCATGATGCCGTCGGGCATG<br>CGCGCCTTGAG                         |
